# Supplementary material
Source: PubMed Central journal article supplement (PMC4245177)
Supplement: ci500537e_si_001.pdf [file ci500537e_si_001.pdf]

## Supporting Information

# (-) Arctigenin and (+) Pinoresinol are antagonists of the Human Thyroid Hormone Receptor $\beta$ .

*Ifedayo Victor Ogungbe\**, Rebecca A. Crouch, Teresa Demeritte.

Department of Chemistry and Biochemistry, Jackson State University, Jackson, MS 39217.

**KEYWORDS:** Lignans, Thyroid Hormone Receptor, Pinoresinol, Arctigenin, Docking.

\*[Ifedayo.v.ogungbe@jsums.edu](mailto:Ifedayo.v.ogungbe@jsums.edu).

**Table S1.** Re-rank docking scores of human thyroid hormone receptor  $\beta$  and phenolics.

| <b>Phenolics</b>                      | <b>Scores</b> | <b>Phenolics</b>                      | <b>Scores</b> | <b>Phenolics</b>                  | <b>Scores</b> |
|---------------------------------------|---------------|---------------------------------------|---------------|-----------------------------------|---------------|
| 5-Sinapoylquinic acid                 | -113.61       | 4,5-Dicaffeoylquinic acid             | -125.52       | Dihydro-p-coumaric acid           | -75.93        |
| 1,2'-Disinapoyl-2-feruloylgentiobiose | No dock       | 4-Caffeoylquinic acid                 | -123.42       | Dihydrocaffeic acid               | -79.81        |
| 1,2,2'-Triferuloylgentiobiose         | No dock       | 4-Feruloylquinic acid                 | -128.78       | Ellagic Acid                      | -90.63        |
| 1,2,2'-Trisinapoylgentiobiose         | No dock       | 4-Hydroxybenzoic acid                 | -70.857       | Ellagic acid acetyl-arabioside    | -95.00        |
| 1,2-Diferuloylgentiobiose             | No dock       | 4-Hydroxybenzoic acid 4-O-glucoside   | -106.43       | Ellagic acid acetyl-xyloside      | -114.45       |
| 1,2-Disinapoylgentiobiose             | No dock       | 4-Hydroxyphenylacetic acid            | -70.814       | Ellagic acid arabioside           | -128.81       |
| 1,3-Dicaffeoylquinic acid             | -115.45       | 4-Sinapoylquinic acid                 | -130.89       | Ellagic acid glucoside            | -105.82       |
| 1,5-Dicaffeoylquinic acid             | -153.82       | 4-p-Coumaroylquinic acid              | -118.52       | Ferulic acid                      | -87.17        |
| 1-Caffeoylquinic acid                 | -124.44       | 5,5'-Dehydrodiferulic acid            | -103.70       | Ferulic acid 4-O-glucoside        | -103.22       |
| 1-Sinapoyl-2,2'-diferuloylgentiobiose | No dock       | 5,8'-Benzofuran dehydrodiferulic acid | -133.23       | Feruloyl glucose                  | -130.25       |
| 1-Sinapoyl-2-feruloylgentiobiose      | No dock       | 5,8'-Dehydrodiferulic acid            | -115.29       | Feruloyl tartaric acid            | -120.11       |
| 2,3-Dihydroxybenzoic acid             | -72.38        | 5-Caffeoylquinic acid                 | -128.60       | Gallic acid                       | -75.40        |
| 2,4-Dihydroxybenzoic acid             | -72.27        | 5-Feruloylquinic acid                 | -121.52       | Gallic acid 3-O-gallate           | -117.71       |
| 2,5-di-S-Glutathionyl caftaric acid   | No dock       | 5-O-Galloylquinic acid                | -124.15       | Gallic acid 4-O-glucoside         | -100.68       |
| 2,6-Dihydroxybenzoic acid             | -72.04        | 5-p-Coumaroylquinic acid              | -116.12       | Gallic acid ethyl ester           | -87.46        |
| 2-Hydroxybenzoic acid                 | -70.81        | 8-O-4'-Dehydrodiferulic acid          | -139.59       | Galloyl glucose                   | -108.69       |
| 2-S-Glutathionyl caftaric acid        | -118.98       | Avenanthramide 2c                     | -114.39       | Gentisic acid                     | -76.76        |
| 2,4-Methylcholestanol ferulate        | No dock       | Avenanthramide 2f                     | -113.07       | Homovanillic acid                 | -85.09        |
| 2,4-Methylcholesterol ferulate        | No dock       | Avenanthramide 2p                     | -113.47       | Homoveratric acid                 | -86.48        |
| 2,4-Methylenecholestanol ferulate     | No dock       | Avenanthramide K                      | -107.58       | Hydroxycaffeic acid               | -89.29        |
| 2,4-Methylthosterol ferulate          | No dock       | Benzoic Acid                          | -67.16        | Isoferulic acid                   | -82.13        |
| 3,4-Dicaffeoylquinic acid             | -123.66       | Caffeic acid                          | -81.20        | Lambertianin C                    | No dock       |
| 3,4-Diferuloylquinic acid             | -73.28        | Caffeic acid 4-O-glucoside            | -97.40        | Methoxyphenylacetic acid          | -72.21        |
| 3,4-Dihydroxyphenylacetic acid        | -80.73        | Caffeic acid ethyl ester              | -94.55        | Protocatechuic acid               | -74.42        |
| 3,5-Dicaffeoylquinic acid             | -88.47        | Caffeoyl aspartic acid                | -113.73       | Protocatechuic acid 4-O-glucoside | -101.66       |
| 3,5-Diferuloylquinic acid             | -91.16        | Caffeoyl glucose                      | -117.73       | Punicalagin                       | No dock       |
| 3,5-Dihydroxybenzoic acid             | -75.46        | Caffeoyl tartaric acid                | -112.26       | Rosmarinic acid                   | -141.06       |
| 3-Caffeoylquinic acid                 | -127.07       | Campesterol ferulate                  | No dock       | Sanguin H-6                       | No dock       |

**Table S1 Cont'd.** Re-rank docking scores of human thyroid hormone receptor  $\beta$  and phenolics.

| <b>Phenolics</b>         | <b>Scores</b> | <b>Phenolics</b>              | <b>Scores</b> | <b>Phenolics</b>          | <b>Scores</b> |
|--------------------------|---------------|-------------------------------|---------------|---------------------------|---------------|
| 3-Feruloylquinic acid    | -127.30       | Chicoric acid                 | -121.21       | Schottenol ferulate       | No dock       |
| 3-Hydroxybenzoic acid    | -69.55        | Cinnamic acid                 | -74.30        | Sinapic acid              | -94.22        |
| 3-Sinapoylquinic acid    | -121.75       | Cinnamoyl glucose             | -95.86        | Sinapine                  | -112.48       |
| 3-p-Coumaroylquinic acid | -111.40       | Dicaffeoylquinic acid         | -120.11       | Sitostanyl ferulate       | No dock       |
| Sitosterol ferulate      | No dock       | m-Coumaric acid               | -76.20        | p-Coumaroyl glycolic acid | -101.77       |
| Stigmastanol ferulate    | No dock       | o-Coumaric acid               | -77.87        | p-Coumaroyl malic acid    | -109.41       |
| Syringic acid            | -85.58        | p-Coumaric acid               | -77.86        | p-Coumaroyl tartaric acid | -111.66       |
| Valoneic acid dilactone  | -134.47       | p-Coumaric acid 4-O-glucoside | -127.75       | p-Coumaroyl tyrosine      | -120.12       |
| Vanillic acid            | -79.70        | p-Coumaric acid ethyl ester   | -89.71        | p-Coumaroylquinic acid    | -112.44       |
| Verbascoside             | -43.75        | p-Coumaroyl glucose           | -112.21       |                           |               |

**Table S2.** Re-rank docking scores of human thyroid hormone receptor  $\beta$  and miscellaneous polyphenols.

| Miscellaneous Polyphenols         | Scores  | Miscellaneous Polyphenols    | Scores  | Miscellaneous Polyphenols | Scores  |
|-----------------------------------|---------|------------------------------|---------|---------------------------|---------|
| 1,4-Naphtoquinone                 | -65.96  | Bisdemethoxycurcumin         | -132.57 | Protocatechuic aldehyde   | -70.20  |
| 2,3-Dihydroxy-1-guaiacylpropanone | -91.69  | Carnosic acid                | -72.31  | Psoralen                  | -84.02  |
| 2-Methoxy-5-prop-1-enylphenol     | -72.70  | Carnosol                     | -70.76  | Pyrogallol                | -63.35  |
| 3,4-DHPEA-AC                      | -90.02  | Carvacrol                    | -71.41  | Rosmadial                 | -73.66  |
| 3,4-DHPEA-EA                      | -125.32 | Catechol                     | -56.72  | Rosmanol                  | -81.13  |
| 3,4-DHPEA-EDA                     | -132.56 | Coumarin                     | -72.26  | Scopoletin                | -79.16  |
| 3,4-Dihydroxyphenylglycol         | -79.381 | Curcumin                     | -144.68 | Sinapaldehyde             | -89.23  |
| 3-Methoxyacetophenone             | -72.66  | Demethoxycurcumin            | -141.03 | Syringaldehyde            | -85.49  |
| 3-Methylcatechol                  | -62.92  | Demethyloleuropein           | -147.46 | Thymol                    | -68.56  |
| 4-Ethylcatechol                   | -70.86  | Epirosmanol                  | -85.56  | Tyrosol                   | -71.33  |
| 4-Ethylguaiacol                   | -72.76  | Esculetin                    | -80.13  | Umbelliferone             | -76.50  |
| 4-Ethylphenol                     | -64.81  | Esculin                      | -118.84 | Vanillin                  | -73.31  |
| 4-Hydroxybenzaldehyde             | -63.66  | Estragole                    | -71.07  | Xanthotoxin               | -93.28  |
| 4-Hydroxycoumarin                 | -72.80  | Eugenol                      | -79.67  | [6]-Gingerol              | -117.70 |
| 4-Methylcatechol                  | -63.63  | Ferulaldehyde                | -84.04  | p-Anisaldehyde            | -69.49  |
| 4-Vinylguaiacol                   | -72.90  | Gallic aldehyde              | -66.69  | p-HPEA-AC                 | -81.37  |
| 4-Vinylphenol                     | -64.45  | Guaiacol                     | -63.43  | p-HPEA-EDA                | -81.27  |
| 4-Vinylsyringol                   | -97.99  | Hydroxytyrosol               | -75.94  |                           |         |
| 5-Heneicosylresorcinol            | -138.94 | Hydroxytyrosol 4-O-glucoside | -99.41  |                           |         |
| 5-Heptadecylresorcinol            | -134.83 | Isopimpinellin               | -81.91  |                           |         |
| 5-Nonadecylresorcinol             | -117.53 | Juglone                      | -66.74  |                           |         |
| 5-Pentacosenylresorcinol          | -103.49 | Ligstroside                  | -140.52 |                           |         |
| 5-Pentacosylresorcinol            | -106.99 | Ligstroside-aglycone         | -122.81 |                           |         |
| 5-Pentadecylresorcinol            | -127.88 | Mellein                      | -54.40  |                           |         |
| 5-Tricosenylresorcinol            | -118.36 | Oleoside 11-methylester      | -103.57 |                           |         |
| 5-Tricosylresorcinol              | -133.53 | Oleoside dimethylester       | -117.01 |                           |         |
| Acetyl eugenol                    | -93.06  | Oleuropein                   | -146.59 |                           |         |
| Anethole                          | -69.41  | Oleuropein-aglycone          | -127.56 |                           |         |
| Arbutin                           | -100.20 | Phenol                       | -53.14  |                           |         |
| Bergapten                         | -83.27  | Phlorin                      | -103.18 |                           |         |

**Table S3.** Re-rank docking scores of human thyroid hormone receptor  $\beta$  and stilbenes.

| Stilbenes                 | Scores  | Stilbenes                 | Scores  | Stilbenes                 | Scores  |
|---------------------------|---------|---------------------------|---------|---------------------------|---------|
| Pallidol                  | No dock | Pterostilbene             | -104.26 | Resveratrol 5-O-glucoside | -124.76 |
| Piceatannol               | -103.11 | Resveratrol               | -96.56  | d-Viniferin               | -75.79  |
| Piceatannol 3-O-glucoside | -128.68 | Resveratrol 3-O-glucoside | -134.08 | e-Viniferin               | -35.01  |
| Pinosylvin                | -89.18  |                           |         |                           |         |

**Table S4.** Re-rank docking scores of human thyroid hormone receptor  $\beta$  and flavanols.

| Flavanols                                                | Score   | Flavanols                        | Score   | Flavanols                   | Score   |
|----------------------------------------------------------|---------|----------------------------------|---------|-----------------------------|---------|
| (+)-Catechin                                             | -102.16 | (-)-Epigallocatechin 3-O-gallate | -71.40  | Procyanidin trimer C2       | no dock |
| (+)-Catechin 3-O-gallate                                 | -79.90  | Cinnamtannin A2                  | no dock | Procyanidin trimer EEC      | no dock |
| (+)-Catechin 3-O-glucose                                 | -96.18  | Procyanidin dimer B1             | no dock | Procyanidin trimer T2       | no dock |
| (+)-Gallocatechin                                        | -105.79 | Procyanidin dimer B2             | no dock | Prodelfinidin dimer B3      | no dock |
| (+)-Gallocatechin 3-O-gallate                            | -100.41 | Procyanidin dimer B3             | no dock | Theaflavin                  | no dock |
| (-)-Epicatechin                                          | -101.96 | Procyanidin dimer B4             | no dock | Theaflavin 3'-O-gallate     | no dock |
| (-)-Epicatechin 3-O-gallate                              | -147.60 | Procyanidin dimer B5             | no dock | Theaflavin 3,3'-O-digallate | no dock |
| (-)-Epicatechin-(2a-7)(4a-8)-epicatechin 3-O-galactoside | no dock | Procyanidin dimer B7             | no dock | Theaflavin 3-O-gallate      | no dock |
| (-)-Epigallocatechin                                     | -108.08 | Procyanidin trimer C1            | no dock |                             |         |

**Table S5.** Re-rank docking scores of human thyroid hormone receptor  $\beta$  and flavanones.

| Flavanones                | Scores  | Flavanones               | Scores  | Flavanones               | Scores  |
|---------------------------|---------|--------------------------|---------|--------------------------|---------|
| 6-Geranyl naringenin      | -133.93 | Hesperidin               | -3.03   | Narirutin 4'-O-glucoside | No dock |
| 6-Prenyl naringenin       | -128.56 | Isoxanthohumol           | -101.24 | Neoeriocitrin            | No dock |
| 8-Prenyl naringenin       | -106.38 | Naringenin               | -96.5   | Neohesperidin            | -44.51  |
| Didymin                   | -65.95  | Naringenin 7-O-glucoside | -112.5  | Pinocembrin              | -93.69  |
| Eriocitrin                | -84.44  | Naringin                 | No dock | Poncirin                 | -0.15   |
| Eriodictyol               | -106.94 | Naringin 4'-O-glucoside  | -71.63  | Sakuranetin              | -90.01  |
| Eriodictyol 7-O-glucoside | -125.86 | Naringin 6'-malonate     | No dock |                          |         |
| Hesperetin                | -99.69  | Narirutin                | -76.95  |                          |         |

**Table S6.** Re-rank docking scores of human thyroid hormone receptor  $\beta$  and anthocyanins, chalcones and dihydrochalcones.

| <b>Anthocyanins/chalcones/<br/>dihydrochalcones</b> | <b>Score</b> | <b>Anthocyanins/chalcones/<br/>dihydrochalcones</b> | <b>Score</b> | <b>Anthocyanins/chalcones/<br/>dihydrochalcones</b> | <b>Score</b> |
|-----------------------------------------------------|--------------|-----------------------------------------------------|--------------|-----------------------------------------------------|--------------|
| Cyanidin                                            | -104.28      | Delphinidin 3-O-sambubioside                        | -9.02        | Petunidin 3-O-(6"-acetyl-galactoside)               | -23.02       |
| Cyanidin 35-O-diglucoside                           | -56.81       | Delphinidin 3-O-xyloside                            | -83.61       | Petunidin 3-O-(6"-acetyl-glucoside)                 | -36.85       |
| Cyanidin 3-(6-p-caffeoyl)glucoside                  | -61.97       | Malvidin 35-O-diglucoside                           | no dock      | Petunidin 3-O-(6"-p-coumaroyl-glucoside)            | -45.46       |
| Cyanidin 3-O-(6"-acetyl-galactoside)                | -83.90       | Malvidin 3-O-(6"-acetyl-galactoside)                | no dock      | Petunidin 3-O-arabioside                            | -16.94       |
|                                                     |              |                                                     |              |                                                     |              |
| Cyanidin 3-O-(6"-acetyl-glucoside)                  | -84.75       | Malvidin 3-O-(6"-acetyl-glucoside)                  | -82.42       | Petunidin 3-O-galactoside                           | -92.43       |
| Cyanidin 3-O-(6"-dioxalyl-glucoside)                | -61.27       | Malvidin 3-O-(6"-caffeoyl-glucoside)                | -78.30       | Petunidin 3-O-glucoside                             | -41.88       |
| Cyanidin 3-O-(6"-malonyl-3"-glucosyl-glucoside)     | no dock      | Malvidin 3-O-(6"-p-coumaroyl-glucoside)             | -52.40       | Petunidin 3-O-rhamnoside                            | -79.47       |
| Cyanidin 3-O-(6"-malonyl-glucoside)                 | -116.71      | Malvidin 3-O-arabioside                             | -48.71       | Petunidin 3-O-rutinoside                            | -99.16       |
| Cyanidin 3-O-(6"-p-coumaroyl-glucoside)             | -69.40       | Malvidin 3-O-galactoside                            | -40.87       | Pigment A                                           | no dock      |
| Cyanidin 3-O-(6"-succinyl-glucoside)                | -105.01      | Malvidin 3-O-glucoside                              | -56.67       | Pinotin A                                           | no dock      |
| Cyanidin 3-O-arabioside                             | -102.61      | Pelargonidin                                        | -93.11       | Vitisin A                                           | no dock      |
| Cyanidin 3-O-galactoside                            | -71.25       | Pelargonidin 35-O-diglucoside                       | no dock      | Butein                                              | -108.11      |
| Cyanidin 3-O-glucosyl-rutinoside                    | no dock      | Pelargonidin 3-O-(6"-malonyl-glucoside)             | -123.74      | Xanthohumol                                         | -128.90      |
| Cyanidin 3-O-rhamnosylglucoside                     | -123.03      | Pelargonidin 3-O-(6"-succinyl-glucoside)            | -107.32      | 3-Hydroxyphloretin 2'-O-glucoside                   | -68.72       |
| Cyanidin 3-O-sambubioside                           | -2.78        | Pelargonidin 3-O-arabioside                         | -95.30       | 3-Hydroxyphloretin 2'-O-xylosyl-glucoside           | -146.84      |
| Cyanidin 3-O-sambubiosyl 5-O-glucoside              | no dock      | Pelargonidin 3-O-galactoside                        | -89.19       | Phloretin                                           | -104.95      |
| Cyanidin 3-O-sophoroside                            | -29.53       | Pelargonidin 3-O-glucoside                          | -108.56      | Phloretin 2'-O-xylosyl-glucoside                    | -103.33      |
| Cyanidin 3-O-xyloside                               | -98.18       | Pelargonidin 3-O-glucosyl-rutinoside                | no dock      | Phloridzin                                          | -133.84      |
| Cyanidin 3-O-xylosyl-rutinoside                     | no dock      | Pelargonidin 3-O-rutinoside                         | -122.62      | Dihydromyricetin 3-O-rhamnoside                     | -63.15       |
| Cyanidin-3-O-glucoside                              | -68.87       | Pelargonidin 3-O-sambubioside                       | no dock      | Dihydroquercetin                                    | -102.46      |
| Delphinidin 35-diglucoside                          | -42.26       | Pelargonidin 3-O-sophoroside                        | -1.83        | Dihydroquercetin 3-O-rhamnoside                     | -78.58       |
| Delphinidin 3-O-(6"-acetyl-galactoside)             | -72.88       | Peonidin                                            | -101.11      |                                                     |              |
| Delphinidin 3-O-(6"-acetyl-glucoside)               | -83.72       | Peonidin 3-O-(6"-acetyl-galactoside)                | -33.03       |                                                     |              |

**Table S6 Cont'd.** Re-rank docking scores of human thyroid hormone receptor  $\beta$  and anthocyanins, chalcones and dihydrochalcones.

| <b>Anthocyanins/chalcones/<br/>dihydrochalcones</b> | <b>Score</b> | <b>Anthocyanins/chalcones/<br/>dihydrochalcones</b> | <b>Score</b> |  |  |
|-----------------------------------------------------|--------------|-----------------------------------------------------|--------------|--|--|
| Delphinidin 3-O-(6"-malonyl-glucoside)              | -53.54       | Peonidin 3-O-(6"-acetyl-glucoside)                  | -44.09       |  |  |
| Delphinidin 3-O-(6"-p-coumaroyl-glucoside)          | -9.977       | Peonidin 3-O-(6"-malonyl-glucoside)                 | -46.77       |  |  |
| Delphinidin 3-O-arabinoside                         | -59.50       | Peonidin 3-O-(6"-p-coumaroyl-glucoside)             | -42.09       |  |  |
| Delphinidin 3-O-feruloyl-glucoside                  | -14.40       | Peonidin 3-O-arabinoside                            | -86.99       |  |  |
| Delphinidin 3-O-galactoside                         | -90.99       | Peonidin 3-O-galactoside                            | -56.12       |  |  |
| Delphinidin 3-O-glucoside                           | -54.74       | Peonidin 3-O-glucoside                              | -104.69      |  |  |
| Delphinidin 3-O-glucosyl-glucoside                  | -131.99      | Peonidin 3-O-rutinoside                             | -83.00       |  |  |
| Delphinidin 3-O-rutinoside                          | -119.84      | Petunidin 35-O-diglucoside                          | no dock      |  |  |

**Table S7.** Re-rank docking scores of human thyroid hormone receptor  $\beta$  and flavones.

| <b>Flavones</b>                                | <b>Scores</b> | <b>Flavones</b>                              | <b>Scores</b> | <b>Flavones</b>                | <b>Scores</b> |
|------------------------------------------------|---------------|----------------------------------------------|---------------|--------------------------------|---------------|
| 5,6-Dihydroxy-7,8,3'4'-tetramethoxyflavone     | -119.77       | Chrysoeriol 7-O-(6"-malonyl-glucoside)       | -93.25        | Luteolin 7-O-diglucuronide     | No dock       |
| 6-Hydroxyluteolin                              | -112.86       | Chrysoeriol 7-O-apiosyl-glucoside            | -114.25       | Luteolin 7-O-glucoside         | -123.10       |
| 6-Hydroxyluteolin 7-O-rhamnoside               | -98.88        | Chrysoeriol 7-O-glucoside                    | -130.94       | Luteolin 7-O-glucuronide       | -111.02       |
| 7,3',4'-Trihydroxyflavone                      | -106.22       | Cirsilineol                                  | -110.78       | Luteolin 7-O-malonyl-glucoside | -141.74       |
| 7,4'-Dihydroxyflavone                          | -95.86        | Cirsimaritin                                 | -93.83        | Luteolin 7-O-rutinoside        | No dock       |
| Apigenin                                       | -98.03        | Diosmin                                      | -51.10        | Neodiosmin                     | No dock       |
| Apigenin 6,8-di-C-glucoside                    | No dock       | Eupatorin                                    | -106.76       | Nepetin                        | -117.42       |
| Apigenin 6-C-glucoside                         | -123.53       | Gardenin B                                   | -111.72       | Nobiletin                      | -120.13       |
| Apigenin 7-O-(6"-malonyl-apiosyl-glucoside)    | No dock       | Geraldone                                    | -108.33       | Pebrellin                      | -111.68       |
| Apigenin 7-O-apiosyl-glucoside                 | -5.47         | Hispidulin                                   | -105.54       | Rhoifolin                      | No dock       |
| Apigenin 7-O-diglucuronide                     | No dock       | Isorhoifolin                                 | -79.89        | Rhoifolin 4'-O-glucoside       | No dock       |
| Apigenin 7-O-glucoside                         | -62.61        | Jaceosidin                                   | -119.20       | Scutellarein                   | -100.41       |
| Apigenin 7-O-glucuronide                       | -121.85       | Luteolin                                     | -107.82       | Sinensetin                     | -108.32       |
| Baicalein                                      | -100.80       | Luteolin 6-C-glucoside                       | -137.01       | Tangeretin                     | -111.16       |
| Chrysin                                        | -90.33        | Luteolin 7-O-(2-apiosyl-6-malonyl)-glucoside | No dock       | Tetramethylscutellarein        | -95.99        |
| Chrysoeriol 7-O-(6"-malonyl-apiosyl-glucoside) | No dock       | Luteolin 7-O-(2-apiosyl-glucoside)           | No dock       |                                |               |

**Table S8.** Re-rank docking scores of human thyroid hormone receptor  $\beta$  and flavonols.

| Flavonols                                                                | Scores  | Flavonols                                     | Scores  | Flavonols                                                         | Scores  |
|--------------------------------------------------------------------------|---------|-----------------------------------------------|---------|-------------------------------------------------------------------|---------|
| 3,7-Dimethylquercetin                                                    | -96.45  | Kaempferol 3-O-acetyl-glucoside               | -57.91  | Quercetin 3-O-(6-malonyl-glucoside)                               | -64.26  |
| 3-Methoxynobiletin                                                       | -104.63 | Kaempferol 3-O-galactoside                    | -48.10  | Quercetin 3-O-(6-malonyl-glucoside) 7-O-glucoside                 | No dock |
| 3-Methoxysinensetin                                                      | -87.87  | Kaempferol 3-O-galactoside 7-O-rhamnoside     | No dock | Quercetin 3-O-acetyl-rhamnoside                                   | -26.38  |
| 3-methylgalangin                                                         | -99.82  | Kaempferol 3-O-glucoside                      | -96.38  | Quercetin 3-O-arabinoside                                         | -51.79  |
| 5,3'4'-Trihydroxy-3-methoxy-6,7-methylenedioxyflavone 4'-O-glucuronide   | -102.09 | Kaempferol 3-O-glucosyl-rhamnosyl-galactoside | No dock | Quercetin 3-O-galactoside 7-O-rhamnoside                          | No dock |
| 5,4'-Dihydroxy-3,3'-dimethoxy-6,7-methylenedioxyflavone 4'-O-glucuronide | -48.25  | Kaempferol 3-O-glucosyl-rhamnosyl-glucoside   | No dock | Quercetin 3-O-glucosyl-rhamnosyl-galactoside                      | No dock |
| 6,8-Dihydroxykaempferol                                                  | -102.89 | Kaempferol 3-O-glucuronide                    | -92.00  | Quercetin 3-O-glucosyl-rhamnosyl-glucoside                        | No dock |
| Galangin                                                                 | -97.48  | Kaempferol 3-O-rhamnoside                     | -105.61 | Quercetin 3-O-glucosyl-xyloside                                   | -102.06 |
| Isorhamnetin                                                             | -94.99  | Kaempferol 3-O-rhamnosyl-rhamnosyl-glucoside  | No dock | Quercetin 3-O-glucuronide                                         | -88.40  |
| Isorhamnetin 3-O-galactoside                                             | -14.55  | Kaempferol 3-O-rutinoside                     | No dock | Quercetin 3-O-rhamnoside                                          | -82.80  |
| Isorhamnetin 3-O-glucoside                                               | -84.08  | Kaempferol 3-O-sophoroside                    | -44.60  | Quercetin 3-O-rutinoside                                          | -127.47 |
| Isorhamnetin 3-O-glucoside 7-O-rhamnoside                                | No dock | Kaempferol 3-O-sophoroside 7-O-glucoside      | No dock | Quercetin 3-O-sophoroside                                         | -4.36   |
| Isorhamnetin 3-O-glucuronide                                             | -56.06  | Kaempferol 3-O-xylosyl-glucoside              | -95.69  | Quercetin 3-O-xyloside                                            | -76.13  |
| Isorhamnetin 3-O-rutinoside                                              | -93.22  | Kaempferol 3-O-xylosyl-rutinoside             | No dock | Quercetin 3-O-xylosyl-glucuronide                                 | -49.20  |
| Isorhamnetin 4'-O-glucoside                                              | -130.14 | Morin                                         | -90.36  | Quercetin 3-O-xylosyl-rutinoside                                  | No dock |
| Isorhamnetin 7-O-rhamnoside                                              | -109.14 | Myricetin 3-O-arabinoside                     | -75.54  | Quercetin 4'-O-glucoside                                          | -129.45 |
| Jaceidin 4'-O-glucuronide                                                | -101.84 | Myricetin 3-O-galactoside                     | -56.96  | Quercetin 74'-O-diglucoside                                       | No dock |
| Kaempferide                                                              | -93.55  | Myricetin 3-O-glucoside                       | -112.59 | Rhamnetin                                                         | -97.99  |
| Kaempferol                                                               | -85.86  | Myricetin 3-O-rhamnoside                      | No dock | Spinacetin 3-O-(2-feruloylglucosyl)(1-6)-[apiosyl(1-2)]-glucoside | No dock |



**Table S8 Cont'd.** Re-rank docking scores of human thyroid hormone receptor  $\beta$  and flavonols.

|                                                          |         |                                                                   |         |                                                                      |         |
|----------------------------------------------------------|---------|-------------------------------------------------------------------|---------|----------------------------------------------------------------------|---------|
| Kaempferol 3,7,4'-O-triglucoside                         | No dock | Myricetin 3-O-rutinoside                                          | -28.75  | Spinacetin 3-O-(2-p-coumaroylglucosyl)(1-6)-[apiosyl(1-2)]-glucoside | No dock |
| Kaempferol 3,7-O-diglucoside                             | No dock | Patuletin 3-O-(2"-feruloylglucosyl)(1-6)-[apiosyl(1-2)]-glucoside | No dock | Spinacetin 3-O-glucosyl-(1-6)-[apiosyl(1-2)]-glucoside               | No dock |
| Kaempferol 3-O-(2"-rhamnosyl-6"-acetyl-galactoside)      | No dock | Patuletin 3-O-glucosyl-(1-6)-[apiosyl(1-2)]-glucoside             | No dock | Spinacetin 3-O-glucosyl-(1-6)-glucoside                              | No dock |
| Kaempferol 3-O-(2"-rhamnosyl-galactoside) 7-O-rhamnoside | No dock | Quercetin                                                         | -108.73 | kaempferol 7-O-glucoside                                             | -67.57  |
| Kaempferol 3-O-(6"-acetyl-galactoside) 7-O-rhamnoside    | 0.99    | Quercetin 3,4'-O-diglucoside                                      | No dock | Myricetin                                                            | -115.28 |
| Kaempferol 3-O-(6-malonyl-galactoside)                   | -86.42  | Quercetin 3-O-(6"-acetyl-galactoside) 7-O-rhamnoside              | No dock |                                                                      |         |

**Table S9.** Re-rank docking scores of human thyroid hormone receptor  $\beta$  and isoflavonoids.

| <b>Isoflavonoids</b> | <b>Scores</b> | <b>Isoflavonoids</b> | <b>Scores</b> | <b>Isoflavonoids</b> | <b>Scores</b> |
|----------------------|---------------|----------------------|---------------|----------------------|---------------|
| 6"-O-Acetyldaidzin   | -120.41       | 6"-O-Malonylglucitin | -86.81        | Formononetin         | -99.38        |
| 6"-O-Acetylgenistin  | -111.35       | Biochanin A          | -106.62       | Genistein            | -100.60       |
| 6"-O-Acetylglycitin  | -121.46       | Coumestrol           | -86.79        | Genistin             | -134.90       |
| 6"-O-Malonyldaidzin  | -130.52       | Daidzein             | -98.78        | Glycitein            | -96.36        |
| 6"-O-Malonylgenistin | -129.07       | Daidzin              | -129.23       | Glycitin             | -123.09       |

**Table S10.** Re-rank docking scores of human thyroid hormone receptor  $\beta$  and lignans.

| <b>Lignans</b>                | <b>Score</b> | <b>Lignans</b>             | <b>Score</b> | <b>Lignans</b>                    | <b>Score</b> |
|-------------------------------|--------------|----------------------------|--------------|-----------------------------------|--------------|
| 1-Acetoxy-pinoreosinol        | -57.03       | Episesaminol               | -130.75      | Secoisolariciresinol-sesquilignan | -62.23       |
| 7-Hydroxymatairesinol         | -136.28      | Isohydroxymatairesinol     | -140.07      | Sesamin                           | -139.78      |
| 7-Hydroxysecoisolariciresinol | -134.65      | Isolariciresinol           | -45.78       | Sesaminol                         | -125.54      |
| 7-Oxomatairesinol             | -127.71      | Lariciresinol              | -136.14      | Sesamolin                         | -137.84      |
| Anhydro-secoisolariciresinol  | -136.93      | Lariciresinol-sesquilignan | -126.92      | Sesamolol                         | -137.89      |
| Arctigenin                    | -139.16      | Matairesinol               | -137.04      | Syringaresinol                    | -139.36      |
| Conidendrin                   | -91.08       | Medioresinol               | -143.02      | Todolactol A                      | -139.25      |
| Cyclolariciresinol            | -73.67       | Nortrachelogenin           | -135.15      | Trachelogenin                     | -144.24      |
| Dimethylmatairesinol          | -138.78      | Pinoreosinol               | -134.37      |                                   |              |
| Episesamin                    | -139.83      | Secoisolariciresinol       | -135.45      |                                   |              |

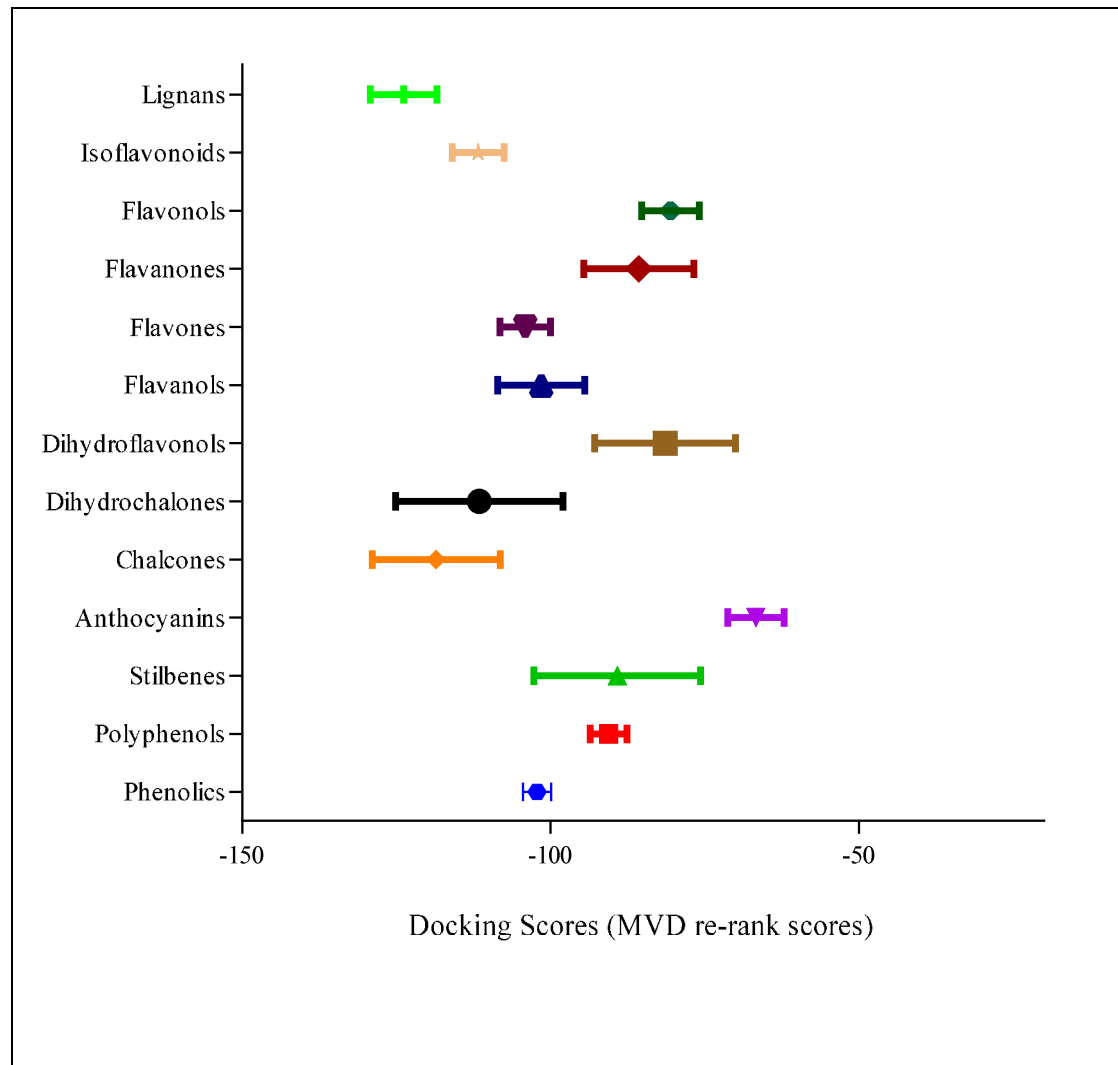

**Figure S1.** Mean  $\pm$ SEM docking re-rank scores of polyphenolic compounds and human thyroid hormone receptor  $\beta$

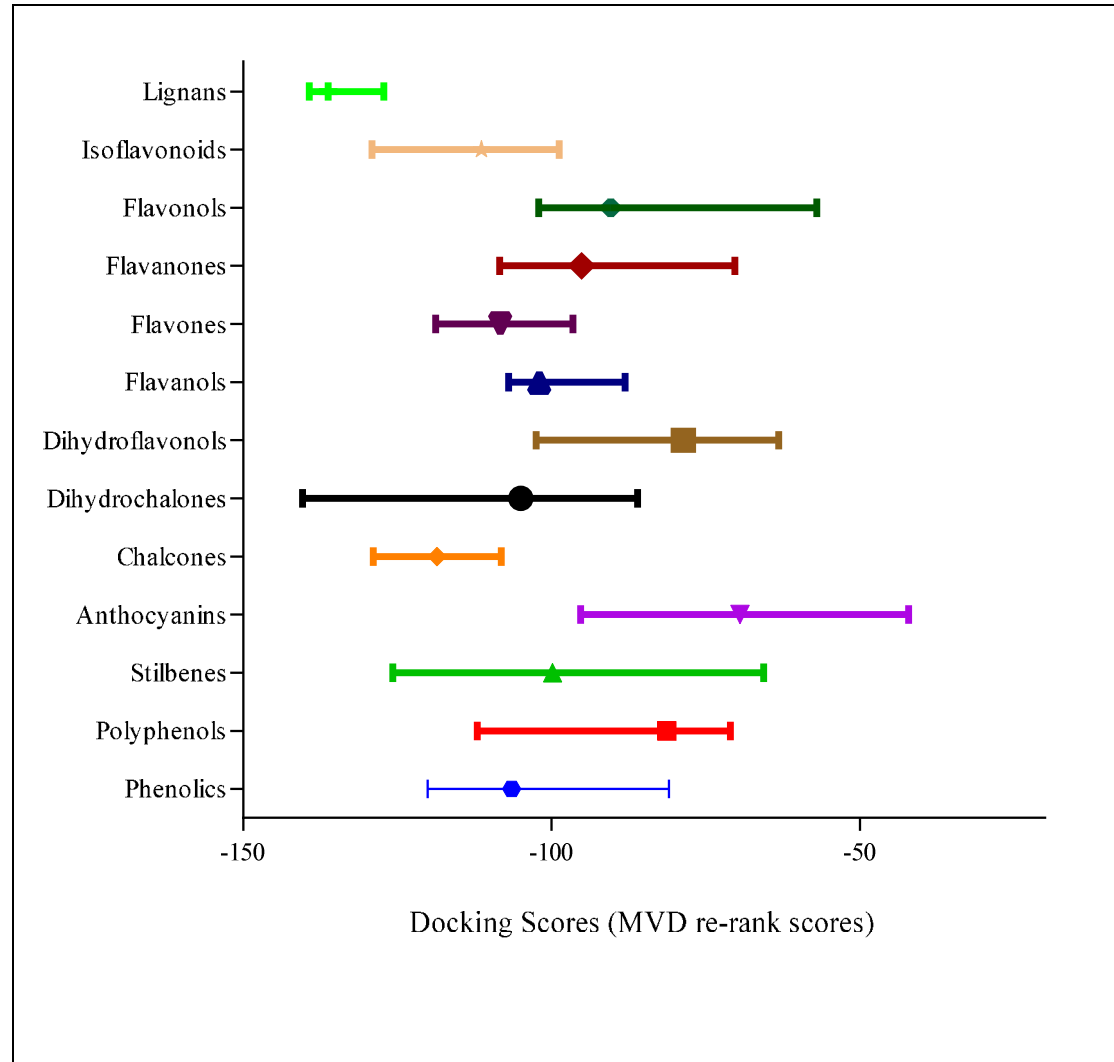

**Figure S2.** Median docking scores with interquartile range of docking re-rank scores of polyphenolic compounds and human thyroid hormone receptor  $\beta$
